# Supplementary material for: PGC-1α overexpression suppresses blood pressure elevation in DOCA-salt hypertensive mice
Source: Oxford University Press journal article supplement (doi:10.1042/bsr20150076), 2015-05-21
Supplement: bsr035e217add.pdf [file bsr035e217add.pdf]

# **PGC-1 $\alpha$ overexpression suppresses blood pressure elevation in DOCA-salt hypertensive mice**

Qingbin Zhao, MD<sup>1</sup>, Junfang Zhang, MD<sup>2</sup>, Huifang Wang, MD<sup>1</sup>

<sup>1</sup>Department of Geratology, the First Affiliated Hospital of Xi'an Jiaotong University, Xi'an, Shannxi, China, <sup>2</sup>Department of Internal Medicine, Chencang Hospital, Baoji, Shannxi, China.

Running title: PGC-1 $\alpha$  and hypertension

Sources of Funding: This work was supported by National Natural Science Foundation of China (81200098) and Shaanxi Province Natural Science Foundation of China (2014K11-03-04-06).

Correspondence to:

Qingbin Zhao,

Department of Geratology, the First Affiliated Hospital of Xi'an Jiaotong University, No. 277 Yanta West Road, Yanta District, Xi'an, Shannxi, 710061, China.

Tel: +86 029 85324043

Fax: +86 029 85323709

E-mail: [zhaoqingbin05@126.com](mailto:zhaoqingbin05@126.com)

## ONLINE SUPPLEMENTAL MATERIALS

### Supplemental Figures

Figure S1

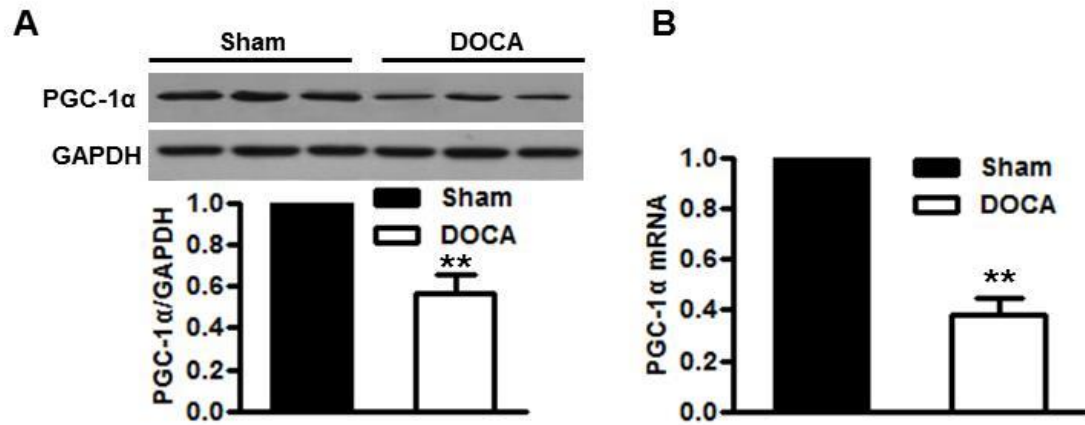

**FIGURE S1 DOCA-salt treatment decreased PGC-1 $\alpha$  expression in mesenteric resistance arteries.** (A, B) western blot (A) and quantitative PCR (B) results showed that PGC-1 $\alpha$  expression in mesenteric resistance arteries isolated from DOCA-salt mice was decreased. \*\*  $P < 0.01$  vs. sham group,  $n = 6$ /group.

Figure S2

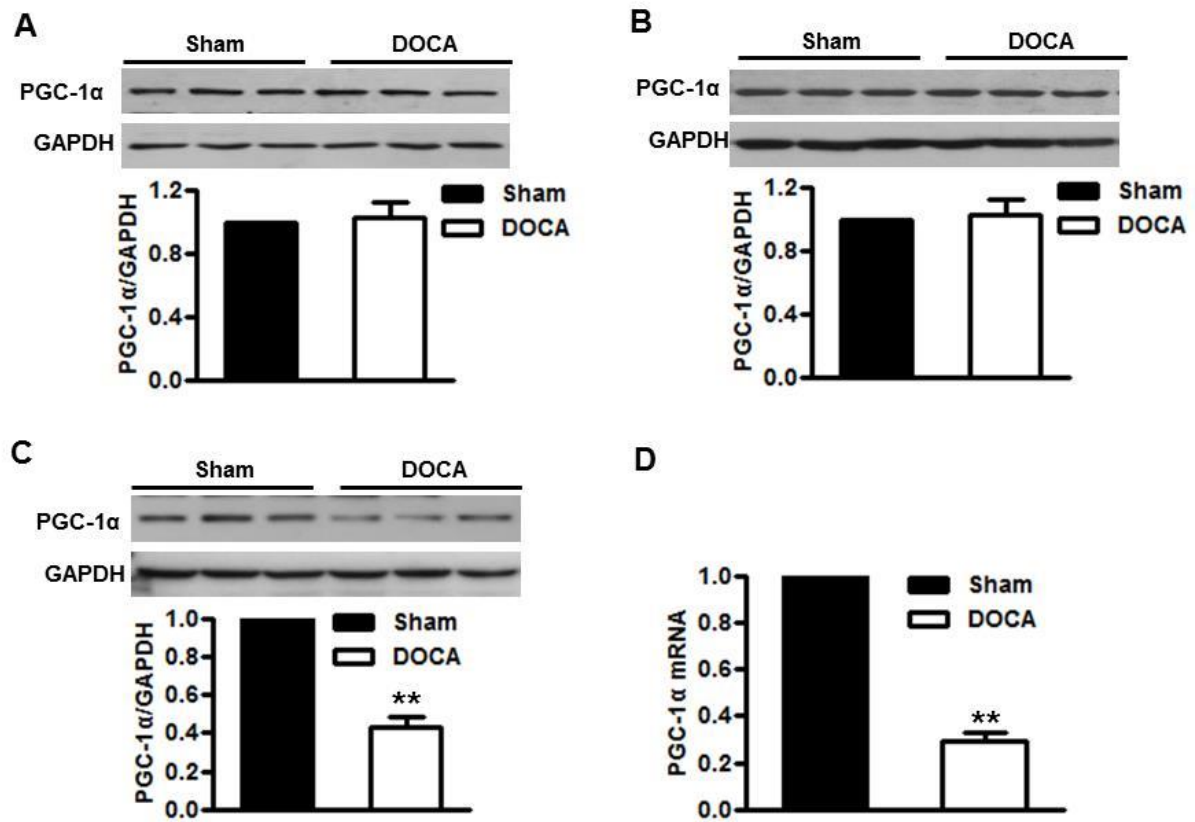

**FIGURE S2 DOCA-salt treatment decreased PGC-1 $\alpha$  expression in MAECs.** (A, B) PGC-1 $\alpha$  expression in aortas (A) and mesenteric resistance arteries (B) which both were stripped from endothelium following DOCA-salt treatment was analyzed by western blot. (C, D) western blot (C) and quantitative PCR (D) results showed that PGC-1 $\alpha$  expression in MAECs isolated from DOCA-salt mice was decreased.

\*\*  $P < 0.01$  vs. sham group,  $n = 6$ /group.

**Figure S3**

**A**

**Gene approach**

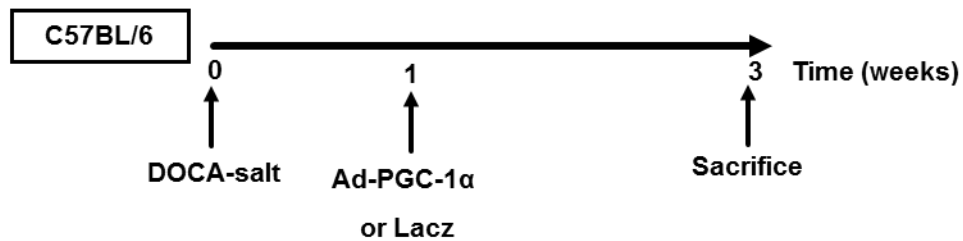

**B**

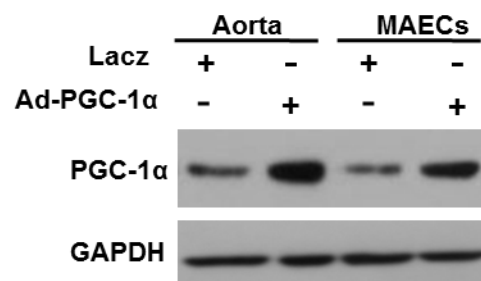

**FIGURE S3 Animal experimental design.** (A) A DOCA-salt hypertension model with a gene approach as schematically illustrated. (B) The infection efficiency of PGC-1α adenovirus was confirmed in aortas and MAECs by western blot. n=6/group.

Figure S4

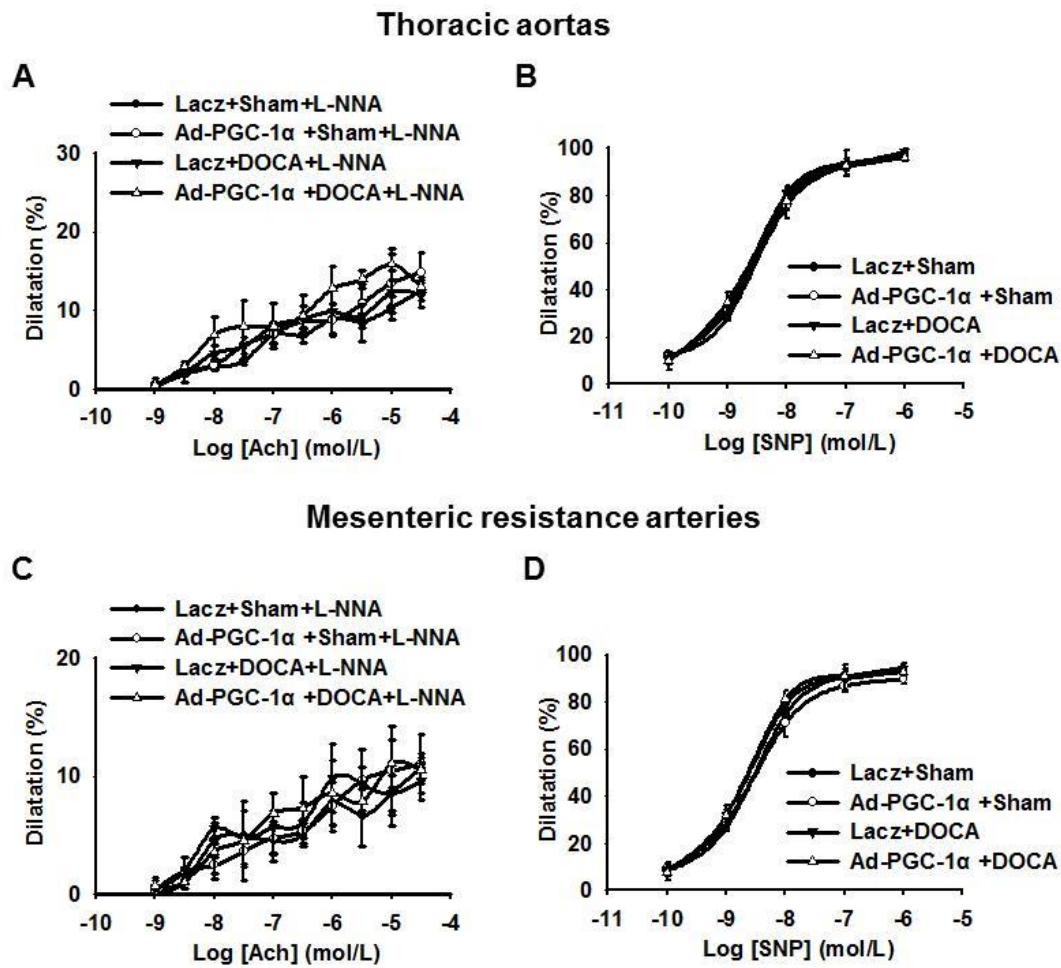

**FIGURE S4 Effects of PGC-1 $\alpha$  on thoracic aortas and mesenteric resistance arteries reactivity.** (A) Endothelium-dependent eNOS-independent relaxation in thoracic aortas was evaluated by measuring the response to acetylcholine (Ach,  $10^{-9}$ - $10^{-5}$  mol/L) after incubation with the eNOS inhibitor N(G)-nitro-L-arginine (L-NNA,  $10^{-4}$  mol/L). (B) Endothelium-independent relaxation to the NO donor sodium nitroprusside (SNP;  $10^{-10}$ - $10^{-6}$  mol/L). (C, D) Endothelium-dependent eNOS-independent relaxation (C) and endothelium-independent relaxation (D) in mesenteric resistance arteries were measured as mentioned above. n=6-8/group.

**Figure S5**

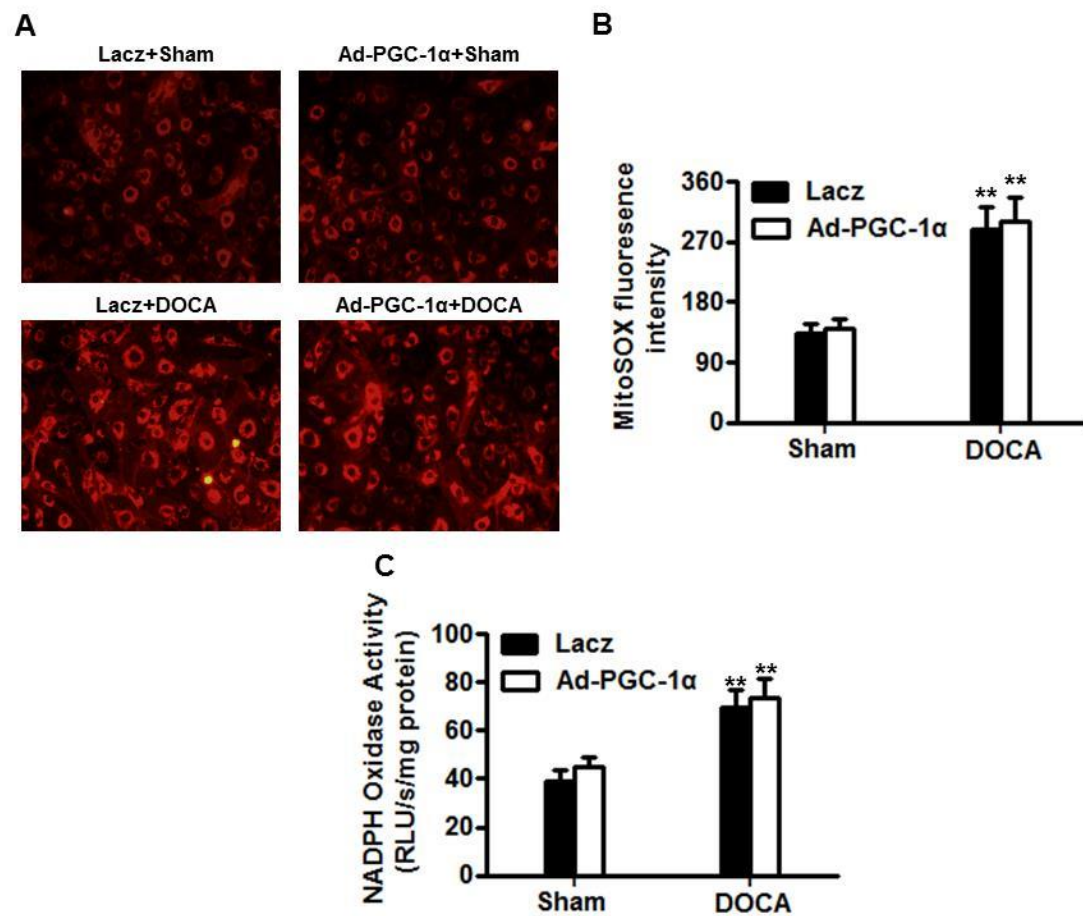

**FIGURE 5 Effects of PGC-1 $\alpha$  overexpression on mitochondrial ROS generation and NADPH oxidase activity in MAECs.** (A) Confocal microscope was used to localize mitochondrial ROS generation ( $\times 200$ ). (B) Quantitative analysis of MitoSOX fluorescence intensity. (C) Quantitation analysis of NADPH oxidase activity measured in the presence of lucigenin (5 mmol/L) followed by treating with or without NADPH (100  $\mu$ mol/L). \*\*  $P < 0.01$  vs. Lacz+sham.

**Figure S6**

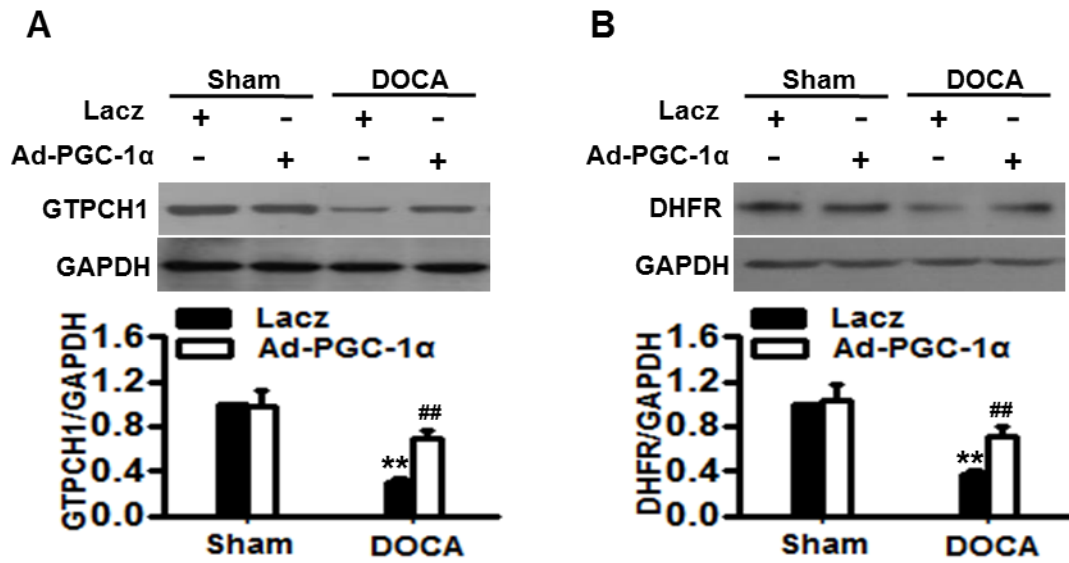

**FIGURE S6 Effects of PGC-1 $\alpha$  on the expression of GTPCH1 and DHFR in aortas.** (A, B) Western blot analysis of the expression of GTPCH1 (A) and DHFR (B) in aortas isolated from LacZ-infected and Ad-PGC-1 $\alpha$ -infected mice with or without DOCA-salt treatment.  $n=6/\text{group}$ .  $^{**}P<0.01$  vs. LacZ+sham;  $^{##}P<0.01$  vs. LacZ+DOCA.
